# Supplementary material for: Ecological Approach to Understanding Superinfection Inhibition in Bacteriophage
Source: Viruses. 2021 Jul 17;13(7):1389. doi: 10.3390/v13071389 (PMC8310164; doi:10.3390/v13071389)
Supplement: Supplementary file 1 [file viruses-13-01389-s001.zip › Supplementary Table S1.xlsx]

## Sheet: Sheet1
Supplementary Table S1. Primers used for amplifying and sequencing phage DNA
TARGET	NAME	5' - 3' SEQUENCE
phiX174 amplification
A half forward	phiX0F	GAGTTTTATCGCTTCCATG
A half reverse	phiX2953R	CCGCCAGCAATAGCACC
B half forward	phiX2605F	CAGGTTGTTTCTGTTGGTGCTG
B half reverse	phiX379R	CTTGACTCATGATTTCTTACC
phiX174 sequencing
A half	phiX0F	GAGTTTTATCGCTTCCATG
A half	phiX500R	GTTACTCGTCAGAAAATCG
A half	phiX1046R	AGGAAGCCAAGATGGGA
A half	phiX1500R	TTGAGATGGCAGCAACGG
A half	phiX2000R	CGGAAAACATCCTTCATAGAA
A half	phiX2500R	TCAAACTATCAAAATATAACGTTGACGATG
A half	phiX2953R	CCGCCAGCAATAGCACC
B half	phiX3381R	GATTCTCAAATCCGGCG
B half	phiX3849R	CGGCAACAGCTTTATC
B half	phiX4292R	CACATTGTAGCATTGT
B half	phix4753R	GCCTGAGTATGGTACAGC
B half	phiX5199R	GGATTAAGCACTCCGTGGA
B half	phiX379R	CTTGACTCATGATTTCTTACC
MiSeq amplifications
phiX174_H	CS1-CI_F1	ACACTGACGACATGGTTCTACAgttgcgtctattatggaaaa
phiX174_H	CS1-CI_F2	ACACTGACGACATGGTTCTACACgttgcgtctattatggaaaa
phiX174_H	CS1-CI_F3	ACACTGACGACATGGTTCTACATCgttgcgtctattatggaaaa
phiX174_H	CS2-CI_R1	TACGGTAGCAGAGACTTGGTCTgtcaaaataatcagcgtg
phiX174_H	CS2-CI_R2	TACGGTAGCAGAGACTTGGTCTCgtcaaaataatcagcgtg
phiX174_H	CS2-CI_R3	TACGGTAGCAGAGACTTGGTCTTCgtcaaaataatcagcgtg
