# Supplementary figures and images for: Ecological Approach to Understanding Superinfection Inhibition in Bacteriophage
Source: MDPI journal article supplement (doi:10.3390/v13071389), 2021-07-17

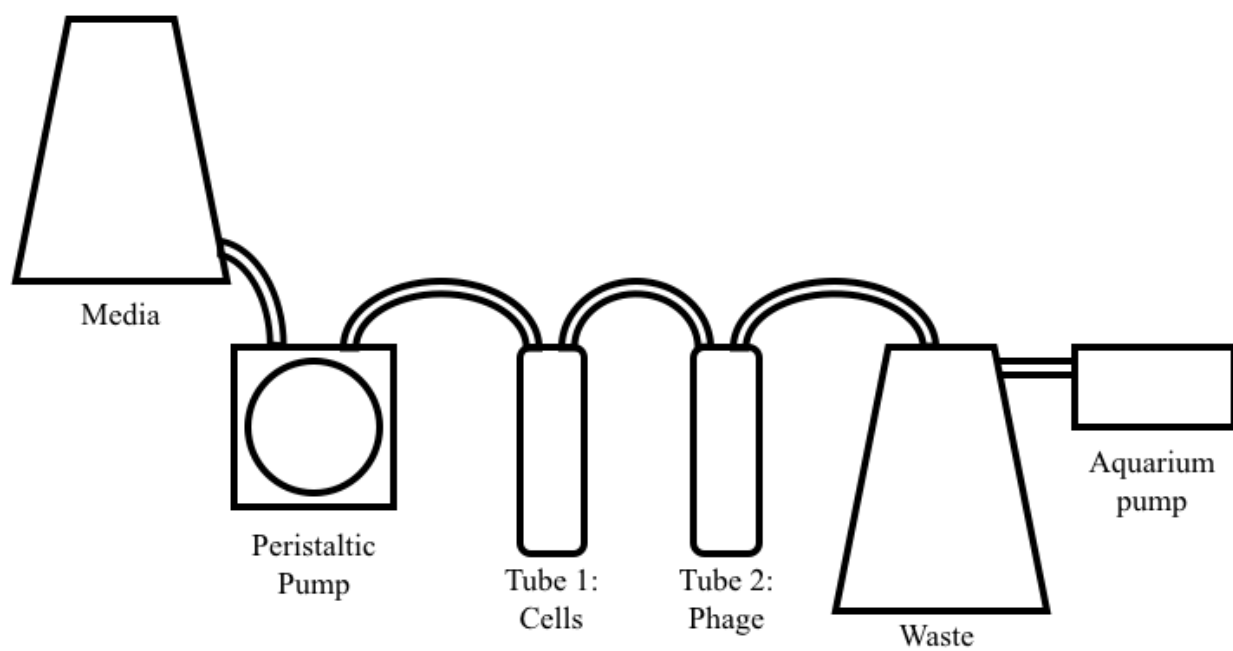

**Figure S1.** Schematic depiction of the two-stage chemostat.

Supplement: s1 [file s1]
